# Supplementary material for: Under dark and visible light: fast degradation of methylene blue in the presence of Ag–In–Ni–S nanocomposites
Source: Royal Society of Chemistry journal article supplement (doi:10.1039/c5ta02888d), 2015-01-01
Supplement: c5ta02888d1.pdf [file c5ta02888d1.pdf]

## Supporting Information

### Under dark and visible light: fast degradation of methylene blue in presence of Ag-In-Ni-S nanocomposites

*Aniruddha Molla,<sup>a</sup> Meenakshi Sahu,<sup>a</sup> Sahid Hussain<sup>\*a</sup>*

<sup>a</sup>Department of Chemistry, Indian Institute of Technology Patna, Patna-800013 India

**\*To whom correspondence should be addressed. Tel.: +91-612-255-2022; fax: +91-612-227- 7383, E-mail: [sahid@iitp.ac.in](mailto:sahid@iitp.ac.in)**

| <b>Content</b>                                                   | <b>Page no</b> |
|------------------------------------------------------------------|----------------|
| Title page                                                       | S1             |
| Experimental General                                             | S2             |
| Synthesis of Ag-In-Ni-S with variation of SDS                    | S2             |
| PXRD data for Ag-In-Ni-S                                         | S3             |
| Quantitative analysis results (RIR) of Sample N8 with JCPDS data | S4-S5          |
| The morphologies of the synthesized Ag-In-Ni-S: FE-SEM and TEM   | S6             |
| EDX of catalyst                                                  | S5-S6          |
| Comparison Table for Ag containing catalyst with Dye             | S7-S8          |
| Catalytic degradations of MB under dark conditions               | S9-S10         |
| Mass spectra of MB                                               | S11            |
| Reusability of catalyst                                          | S12            |

### **General Experimental procedure:**

All reagents were purchased either from Sigma or Alpha Aesar. Solvents were dried and purified using standard techniques. IR spectra were recorded in KBr on a Shimadzu IR Afinity I. SEM images were obtained from a Hitachi S-4800 microscope at an operating voltage of 15Kv. The sample was coated with platinum for effectual imaging before being charged. TEM images were obtained from JEOL instrument using Cu grid. UV-vis and fluorescence data was recorded in UV-vis spectrophotometers of Shimadzo UV-2550 using standard 1 cm quartz cuvette and Fluoromax-4 spectrofluorometer of Horiba Jobin YVON respectively. X-ray powder diffraction study was carried out on a Rigaku X-Ray diffractometer at a voltage of 10 Kv using Cu K $\alpha$  radiations ( $\lambda=0.15418$  nm) at scanning rate of 0.50°/minute in the 2 $\theta$  range 10-80°. Surface Analysis by XPS is accomplished by irradiating a sample with monoenergetic soft X-ray, Mg K $\alpha$  (1253.6 eV) was performed using the ESCAprobe TPD system in an ultra-high vacuum system. TGA experiment was carried out in SDT Q600. BET measurement was performed using Smart Instruments; Smart Sorb 92/93.

**Table S1.** Synthesis of Ag-In-Ni-S with variation of SDS

| Sl No | Catalyst Code | Reaction Condition      | Ratio (mmol)       |                  |
|-------|---------------|-------------------------|--------------------|------------------|
|       |               |                         | Starting materials | Surfactant (SDS) |
| 01    | <b>N1</b>     | 80° C                   | 1.0                | <b>0.10</b>      |
| 02    | <b>N2</b>     | 80° C                   | 1.0                | <b>0.20</b>      |
| 03    | <b>N3</b>     | 80° C                   | 1.0                | <b>0.25</b>      |
| 04    | <b>N4</b>     | 130° C, Hydrothermal    | 1.0                | <b>0.25</b>      |
| 05    | <b>N5</b>     | 80° C                   | 1.0                | <b>0.50</b>      |
| 06    | <b>N6</b>     | 30° C, Room Temperature | 1.0                | <b>1.00</b>      |
| 07    | <b>N7</b>     | 80° C                   | 1.0                | <b>1.00</b>      |
| 08    | <b>N8</b>     | 80° C                   | 1.0                | <b>1.50</b>      |

**Table S2, a: Phase name and JCPDS Data**

| Phase name     | Formula                           | DB card number |
|----------------|-----------------------------------|----------------|
| Silver Indium  | Ag In S <sub>2</sub>              | 01-075-0117    |
| Indium Sulfide | In <sub>2</sub> S <sub>3</sub>    | 00-025-0390    |
| Acanthite, syn | Ag <sub>2</sub> S                 | 03-065-2356    |
| Vaesite, syn   | Ni S <sub>2</sub>                 | 03-065-3325    |
| Indium Nickel  | In <sub>2</sub> Ni S <sub>4</sub> | 01-070-2900    |

**Table S2, b: Quantitative analysis results (RIR) of Sample N8**

| <b>2-θ (deg)</b> | <b>Phase name</b>                                                                                                              | <b>DB card number</b>                                               |
|------------------|--------------------------------------------------------------------------------------------------------------------------------|---------------------------------------------------------------------|
| 22.29            | Indium Sulfide(0,0,8), Acanthite, syn(1,0,-1)                                                                                  | 00-025-0390,03-065-2356                                             |
| 25.05            | Indium Sulfide(2,0,4), Acanthite, syn(1,1,0), Indium Nickel Sulfide(2,2,0)                                                     | 00-025-0390,03-065-2356,<br>01-070-2900                             |
| 26.66            | Silver Indium Sulfide(1,1,2), Acanthite, syn(0,1,2), Vaesite, syn(1,1,1)                                                       | 01-075-0117,03-065-2356,<br>03-065-3325                             |
| 28.43            | Silver Indium Sulfide(1,0,3), Indium Sulfide(1,0,9), Acanthite, syn(0,2,1), Indium Nickel Sulfide(3,1,1)                       | 01-075-0117,00-025-0390,<br>03-065-2356,01-070-2900                 |
| 31.53            | Silver Indium Sulfide(0,0,4), Acanthite, syn(1,1,-2), Vaesite, syn(2,0,0)                                                      | 01-075-0117,03-065-2356,<br>03-065-3325                             |
| 34.42            | Indium Sulfide(0,0,12), Acanthite, syn(1,2,0), Indium Nickel Sulfide(4,0,0)                                                    | 00-025-0390,03-065-2356,<br>01-070-2900                             |
| 35.32            | Silver Indium Sulfide(2,1,1), Indium Sulfide(2,2,4), Vaesite, syn(2,1,0)                                                       | 01-075-0117,00-025-0390,<br>03-065-3325                             |
| 36.71            | Indium Sulfide(3,0,3), Acanthite, syn(1,1,2), Indium Nickel Sulfide(3,3,1)                                                     | 00-025-0390,03-065-2356,<br>01-070-2900                             |
| 38.75            | Indium Sulfide(1,0,13), Acanthite, syn(1,2,-2), Vaesite, syn(2,1,1)                                                            | 00-025-0390,03-065-2356,<br>03-065-3325                             |
| 43.9             | Silver Indium Sulfide(2,1,3), Indium Sulfide(3,2,1), Acanthite, syn(1,2,2), Indium Nickel Sulfide(4,2,2)                       | 01-075-0117,00-025-0390,<br>03-065-2356,01-070-2900                 |
| 44.65            | Silver Indium Sulfide(2,0,4), Indium Sulfide(1,0,15), Acanthite, syn(1,3,0), Vaesite, syn(2,2,0)                               | 01-075-0117,00-025-0390,<br>03-065-2356,03-065-3325                 |
| 48.00            | Silver Indium Sulfide(3,0,1), Indium Sulfide(2,2,12), Acanthite, syn(0,0,4), Vaesite, syn(2,2,1), Indium Nickel Sulfide(4,4,0) | 01-075-0117,00-025-0390,<br>03-065-2356,03-065-3325,<br>01-070-2900 |
| 51.17            | Indium Sulfide(4,1,5), Acanthite, syn(2,2,0)                                                                                   | 00-025-0390,03-065-2356                                             |
| 53.44            | Silver Indium Sulfide(3,1,2), Indium Sulfide(4,0,8), Acanthite, syn(1,2,3), Vaesite, syn(3,1,1), Indium Nickel Sulfide(5,3,1)  | 01-075-0117,00-025-0390,<br>03-065-2356,03-065-3325,<br>01-070-2900 |
| 56.52            | Indium Sulfide(4,2,6)                                                                                                          | 00-025-0390                                                         |
| 58.40            | Acanthite, syn(1,4,-1), Vaesite, syn(3,0,2), Indium Nickel Sulfide(6,2,2)                                                      | 03-065-2356,03-065-3325,<br>01-070-2900                             |
| 60.90            | Acanthite, syn(2,1,-4), Vaesite, syn(3,2,1), Indium Nickel Sulfide(4,4,4)                                                      | 03-065-2356,03-065-3325,<br>01-070-2900                             |

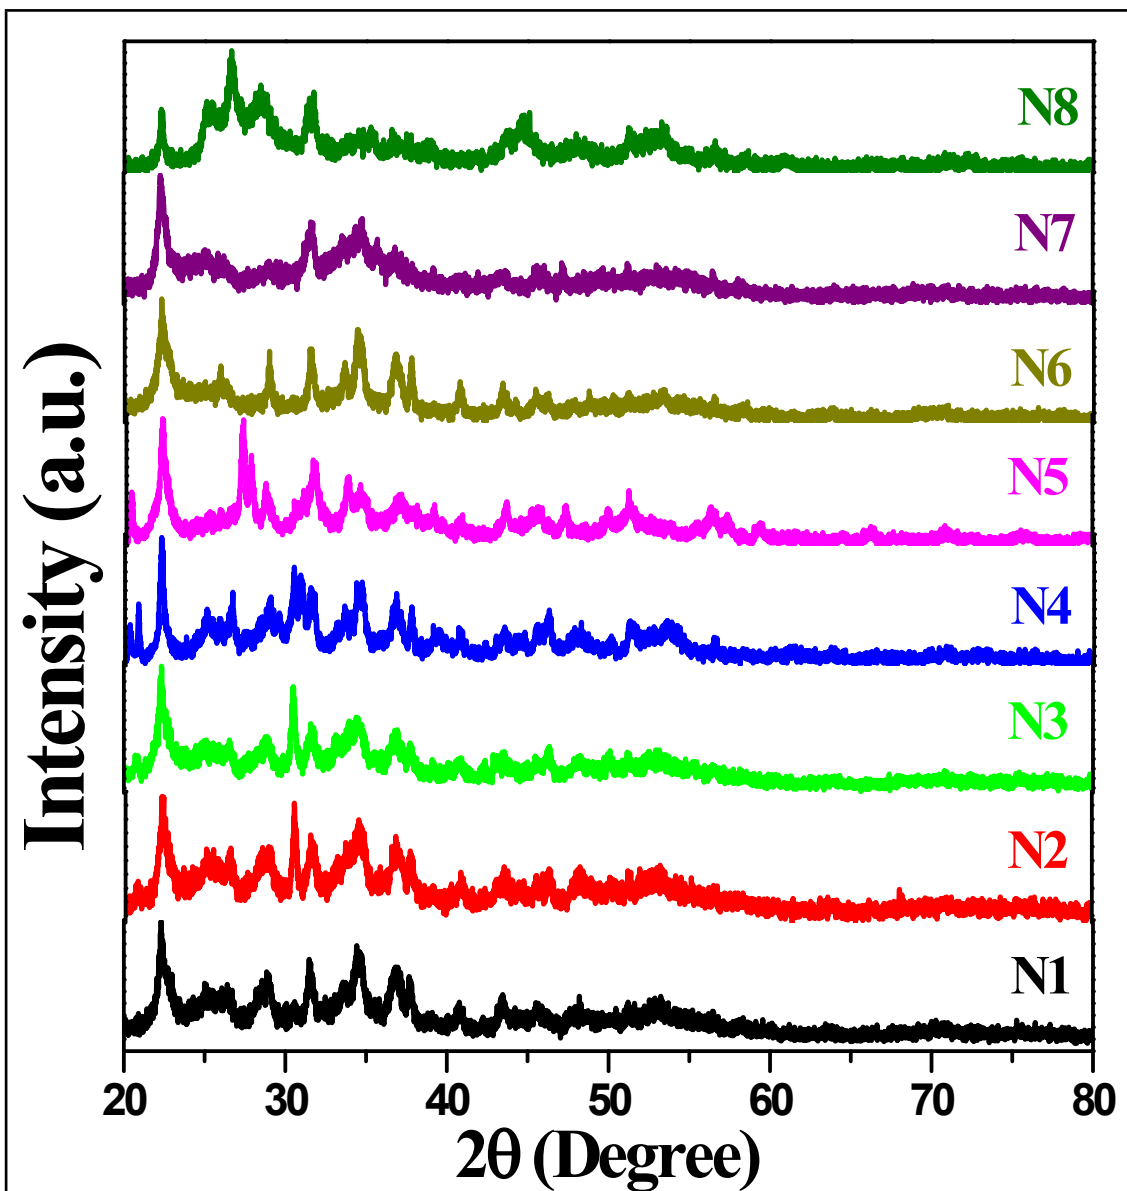

Fig. S1 PXRD plot of N1-N8.

## The morphologies of the synthesized Ag-In-Ni-S: FE-SEM and TEM

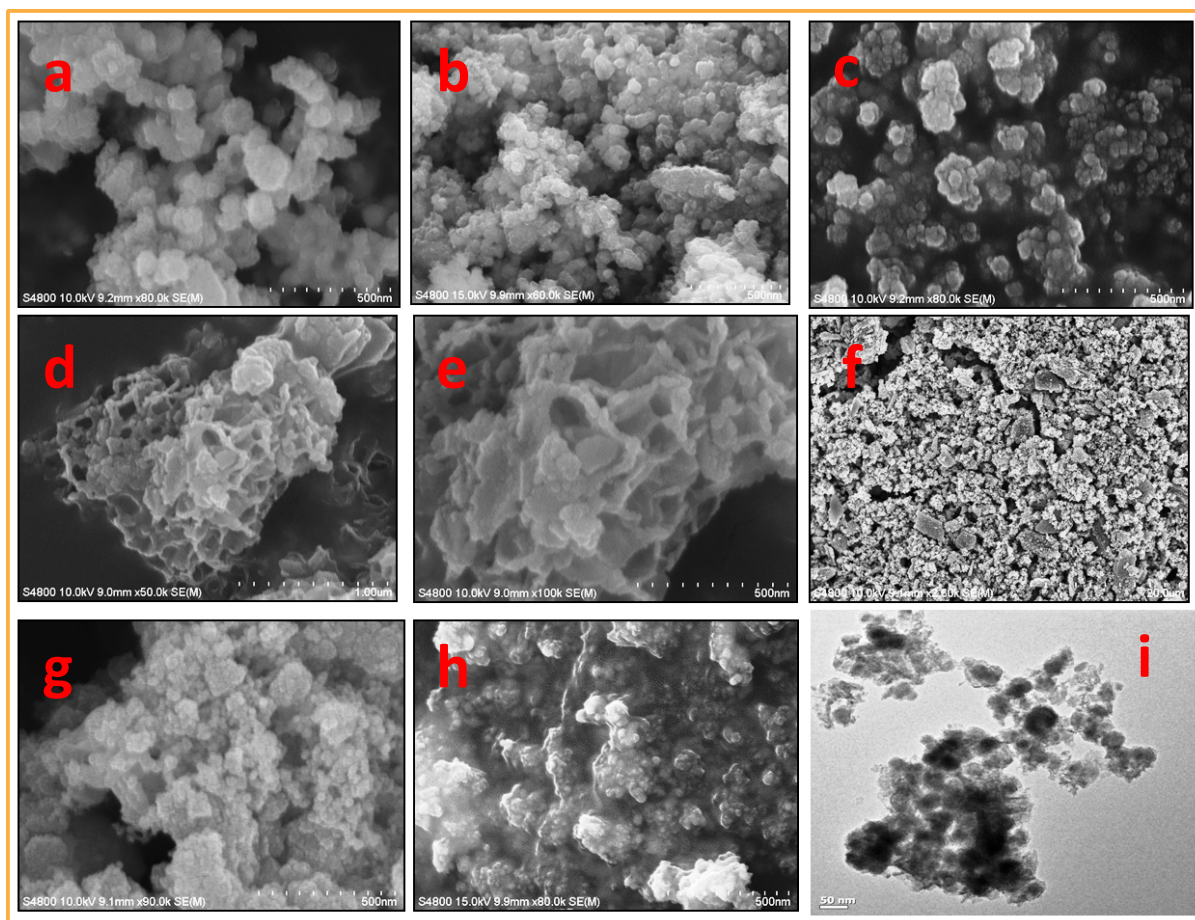

**Fig. S2** a) FE-SEM image of sample N1, b) FE-SEM image of sample N2, c) FE-SEM image of sample N3, d) Low magnification FE-SEM image of sample N4 , e) FE-SEM image of sample N4 at 500nm, f) Low magnification FE-SEM image of sample N6 , g) FE-SEM image of sample N6 at 500nm, h) FE-SEM image of sample N7, i) TEM image of sample N5 at 50nm.

**Table S3** Distribution of Elements percentage from EDX analysis

| Sl | Catalyst  | Element Weight (%) |        |        |         |
|----|-----------|--------------------|--------|--------|---------|
|    |           | Silver             | Indium | Nickel | Sulfide |
| 01 | <b>N1</b> | 39.48              | 42.83  | 4.03   | 13.66   |
| 02 | <b>N3</b> | 44.98              | 39.33  | 1.41   | 14.28   |
| 03 | <b>N4</b> | 28.62              | 46.48  | 10.56  | 19.34   |
| 04 | <b>N5</b> | 31.21              | 34.97  | 9.07   | 24.75   |
| 05 | <b>N6</b> | 37.01              | 51.82  | 0.91   | 10.26   |
| 06 | <b>N8</b> | 32.96              | 32.92  | 9.34   | 24.79   |

### EDX Line Spectra of Ag-In-Ni-S

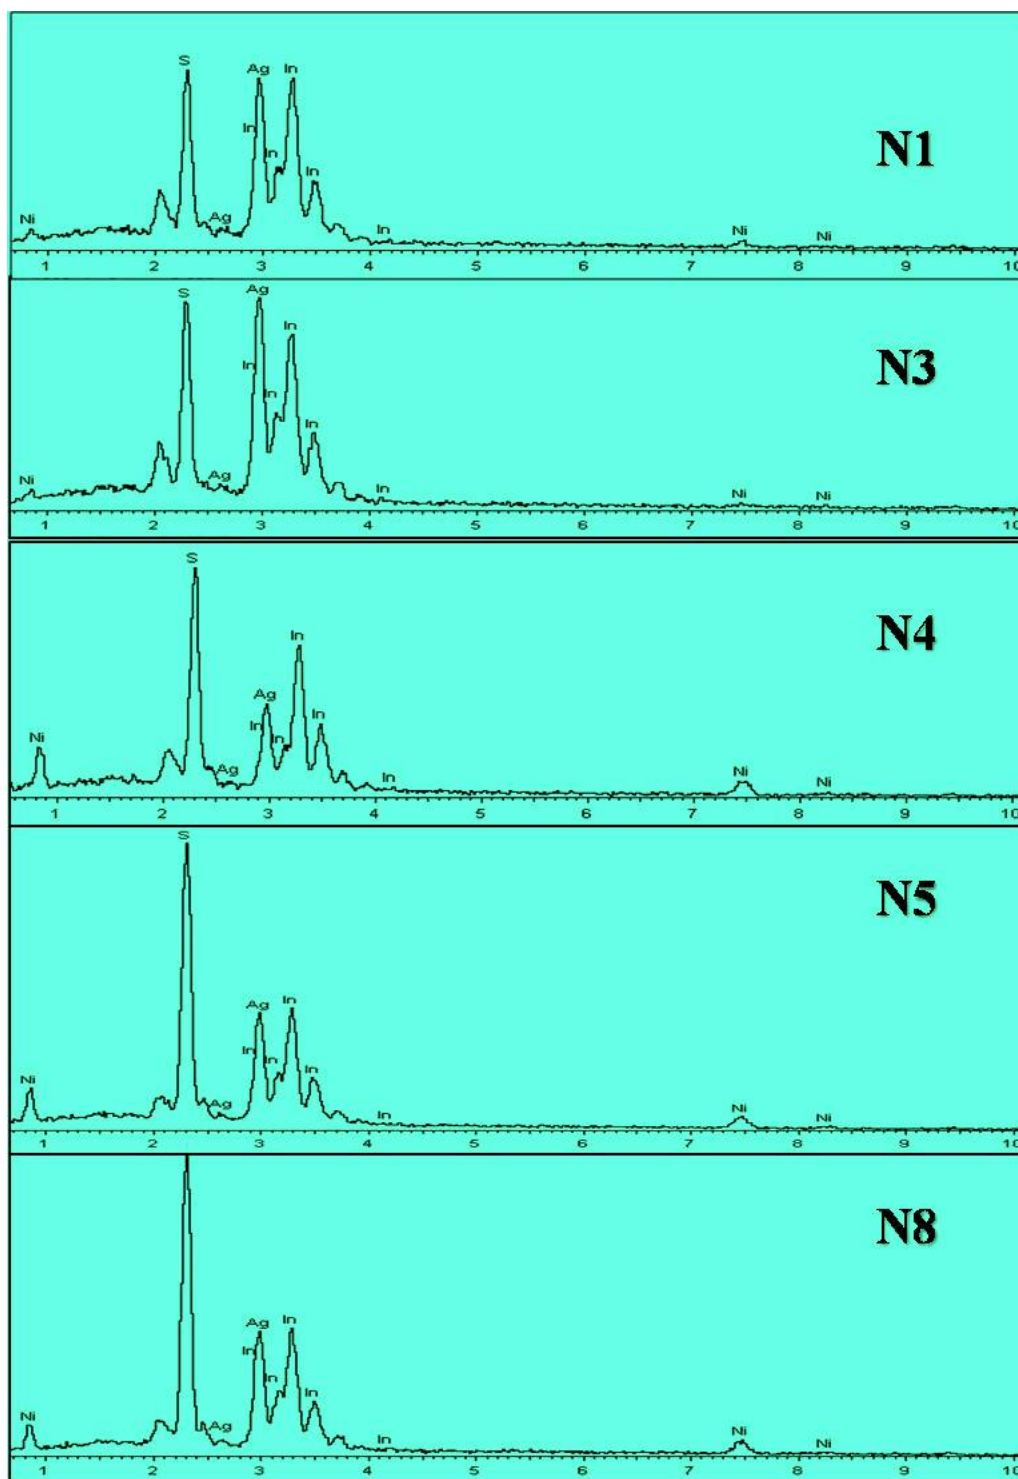

Fig. S3 EDX Line Spectra of Ag-In-Ni-S

**Table S4** Degradation of MB in absence of light

| Sl No | Sample   | Reaction Condition  | % MB     |           |
|-------|----------|---------------------|----------|-----------|
|       |          |                     | Consumed | Remaining |
| 01    | N1       | <b>Dark</b>         | 60.04    | 39.96     |
| 02    | N2       | <b>12 min</b>       | 60.04    | 39.96     |
| 03    | N3       | <b>(in absence</b>  | 92.10    | 7.90      |
| 04    | N4       | <b>of light)</b>    | 87.76    | 12.24     |
| 05    | N5       | <b>catalyst +MB</b> | 92.29    | 7.71      |
| 06    | N6       | <b>Stirring</b>     | 48.31    | 51.69     |
| 07    | N7       | <b>condition</b>    | 94.46    | 5.54      |
| 08    | N8       |                     | 97.52    | 2.48      |
| 09    | MB Blank |                     | 0.64     | 99.36     |
| 10    | N5       | 100W (4min)         | 99.30    | 0.70      |
| 11    | N8       | 100W (4min)         | 99.80    | 0.20      |
| 12    | N5       | Sunlight (2min)     | 100.00   | 00        |

**Table S5** Comparison Table for Ag containing catalyst with Dye

| Sl | Catalyst                                                                         | Light Source                                                                                       | Dye                                  | Time    | Ref |
|----|----------------------------------------------------------------------------------|----------------------------------------------------------------------------------------------------|--------------------------------------|---------|-----|
| 01 | Silver indium tungsten oxide [AgIn(WO <sub>4</sub> ) <sub>2</sub> ] mesocrystals | UV and visible light (300 W Xe lamp)                                                               | Rhodamine B, Methyl Orange & Eosin Y | 60 min  | 13a |
| 02 | Ag/TiO <sub>2</sub> /graphene Nanocomposite                                      | 500W halogen lamp                                                                                  | Methylene blue                       | 60 min  | 13b |
| 03 | Multi-walled carbon nanotubes loaded with Ag nanoparticles (Ag/MWNTs)            | Visible light irradiation ( $\lambda > 420$ nm)                                                    | Rhodamine B                          | 8 hour  | 13c |
| 04 | Silver phosphate crystals                                                        | Ultraviolet light (8 W)                                                                            | Rhodamine B (RhB)                    | 4 hour  | 13d |
| 05 | Titania-silica photocatalysts: effect of carbon and silver doping                | A xenon lamp (300 W) equipped with a UV-cutoff filter to remove the light below 400 nm wavelengths | Rhodamine B (RhB)                    | 2.5hour | 13e |

|    |                                                                                                                                    |                                                                                            |       |                                   |              |                |
|----|------------------------------------------------------------------------------------------------------------------------------------|--------------------------------------------------------------------------------------------|-------|-----------------------------------|--------------|----------------|
| 06 | ZnSeIn <sub>2</sub> Se <sub>3</sub> Ag <sub>2</sub> S solid solution coupled with TiO <sub>2-x</sub> S <sub>x</sub> nanotubes film | 500 W Xe lamp                                                                              |       | photocatalytic hydrogen evolution | 5 hour       | 13f            |
| 07 | Ag <sub>2</sub> S/MCM-41                                                                                                           | UV lamp                                                                                    |       | Methylene blue                    | 60 min       | 13g            |
| 08 | Ag-entrapped hydrogel                                                                                                              | Tested to catalyze the NaBH <sub>4</sub> reduction                                         |       | Methylene blue & Congo Red        | 40 min       | 13h            |
| 09 | Ag <sub>2</sub> O–Bi <sub>2</sub> O <sub>3</sub> composites                                                                        | 500 W Xe lamp                                                                              |       | Methyl Orange (MO)                | 60 min       | 13i            |
| 10 | AgBr/AgI@Ag composite                                                                                                              | 500W halogen tungsten lamp                                                                 |       | Methyl orange (MO)                | 30 min       | 13j            |
| 11 | TiO <sub>2</sub> @Ag heterojunction                                                                                                | 150 W GYZ220 high-pressure Xenon Lamp. average light intensity was 50 mW/cm <sup>2</sup> . |       | Methylene blue (MB)               | 60 min       | 13k            |
| 12 | Silver phosphate myriapods                                                                                                         | Visible irradiation ( $\lambda > 420$ nm)                                                  | light | Rhodamine B (RhB)                 | 15 min       | 13l            |
| 13 | Silver(I) with a hybrid pyrazine–bipyridine ligand                                                                                 | UV light                                                                                   |       | Methylene Blue (MB)               | 400min       | 13m            |
| 14 | Silver-nanoparticle-decorated AgVO <sub>3</sub> nanoribbons                                                                        | Visible irradiation                                                                        | light | Crystal violet (CV)               | 90 min       | 13n            |
| 15 | Ag/CN-TiO <sub>2</sub> @g-C <sub>3</sub> N <sub>4</sub>                                                                            | Visible light                                                                              |       | Rhodamine B (RhB)                 | 120min       | 13o            |
| 16 | Ag@AgCl nanoframe                                                                                                                  | 300 W Xe lamp                                                                              |       | Methyl Orange (MO)                | 36 min       | 13p            |
| 17 | <b>Ag-In-Ni-S nanocluster</b>                                                                                                      | <b>No Light</b>                                                                            |       | <b>Methylene Blue (MB)</b>        | <b>12min</b> | <b>Present</b> |
| 18 | <b>Ag-In-Ni-S nanocluster</b>                                                                                                      | <b>100W lamp</b>                                                                           |       | <b>Methylene Blue (MB)</b>        | <b>4min</b>  | <b>Present</b> |
| 19 | <b>Ag-In-Ni-S nanocluster</b>                                                                                                      | <b>Sunlight</b>                                                                            |       | <b>Methylene Blue (MB)</b>        | <b>2min</b>  | <b>Present</b> |



### Catalytic degradations of MB under dark conditions

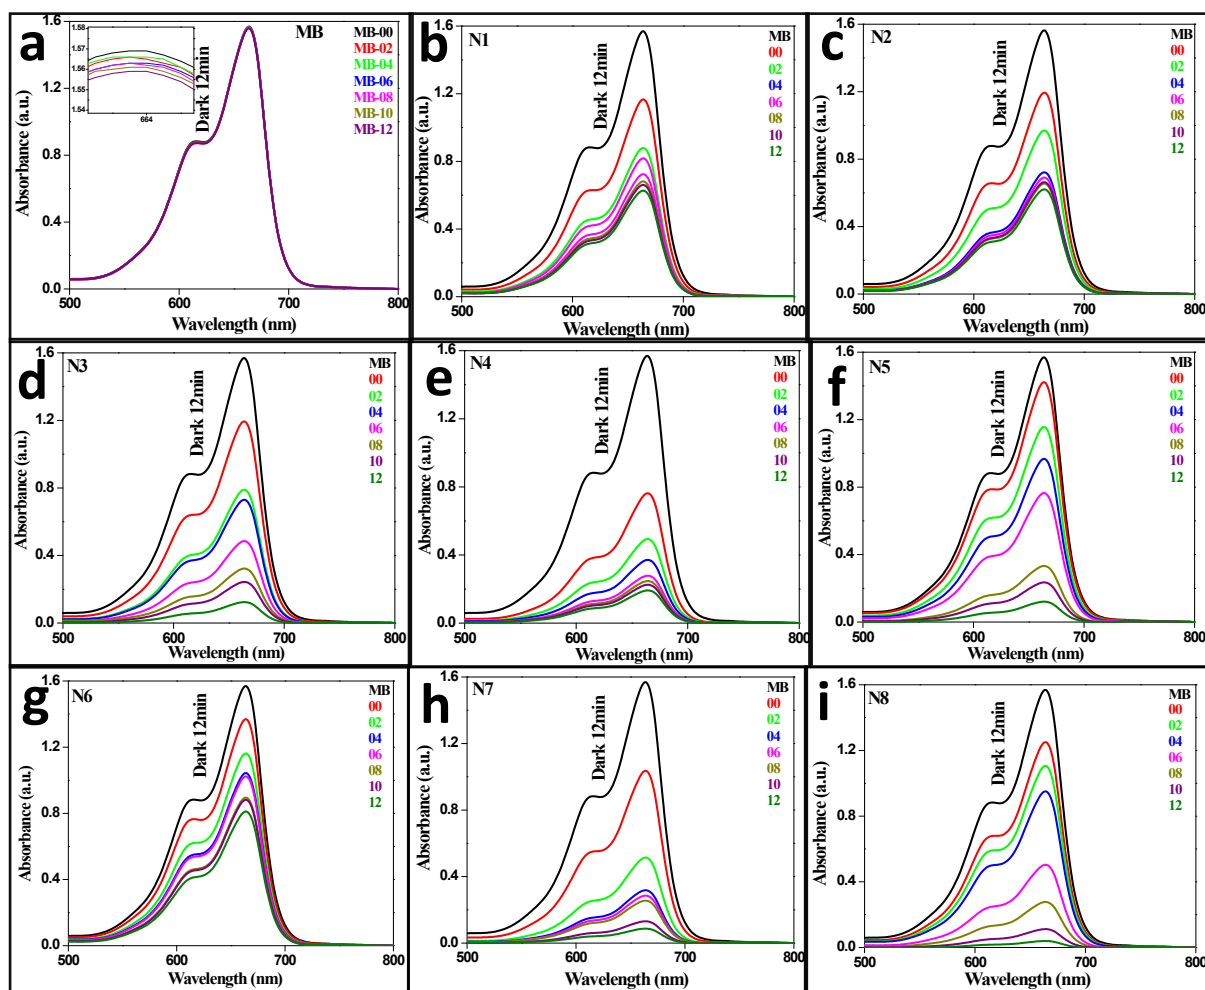

**Fig. S4** Fate of MB in presence of a) without catalyst under dark, b) N1, c) N2, d) N3, e) N4, f) N5, g) N6, h) N7 and i) N8.

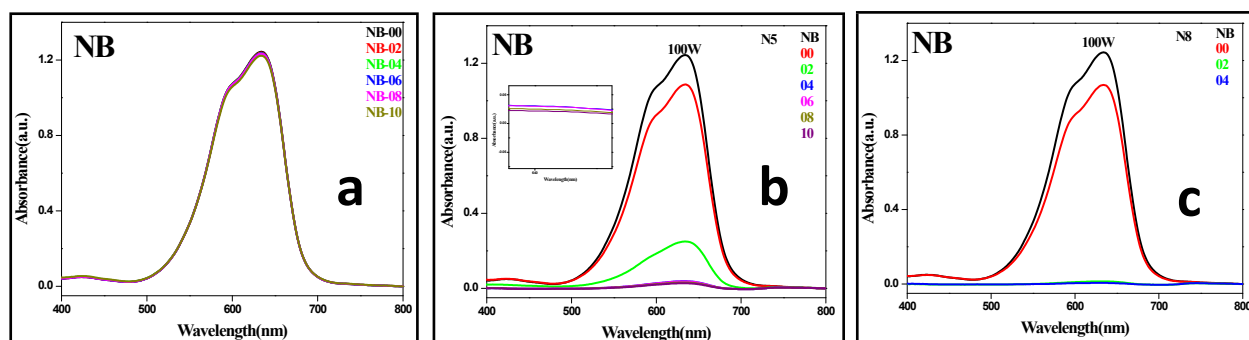

**Fig. S5** Fate of NB under 100W lamp a) without catalyst, b) N5, c) N8

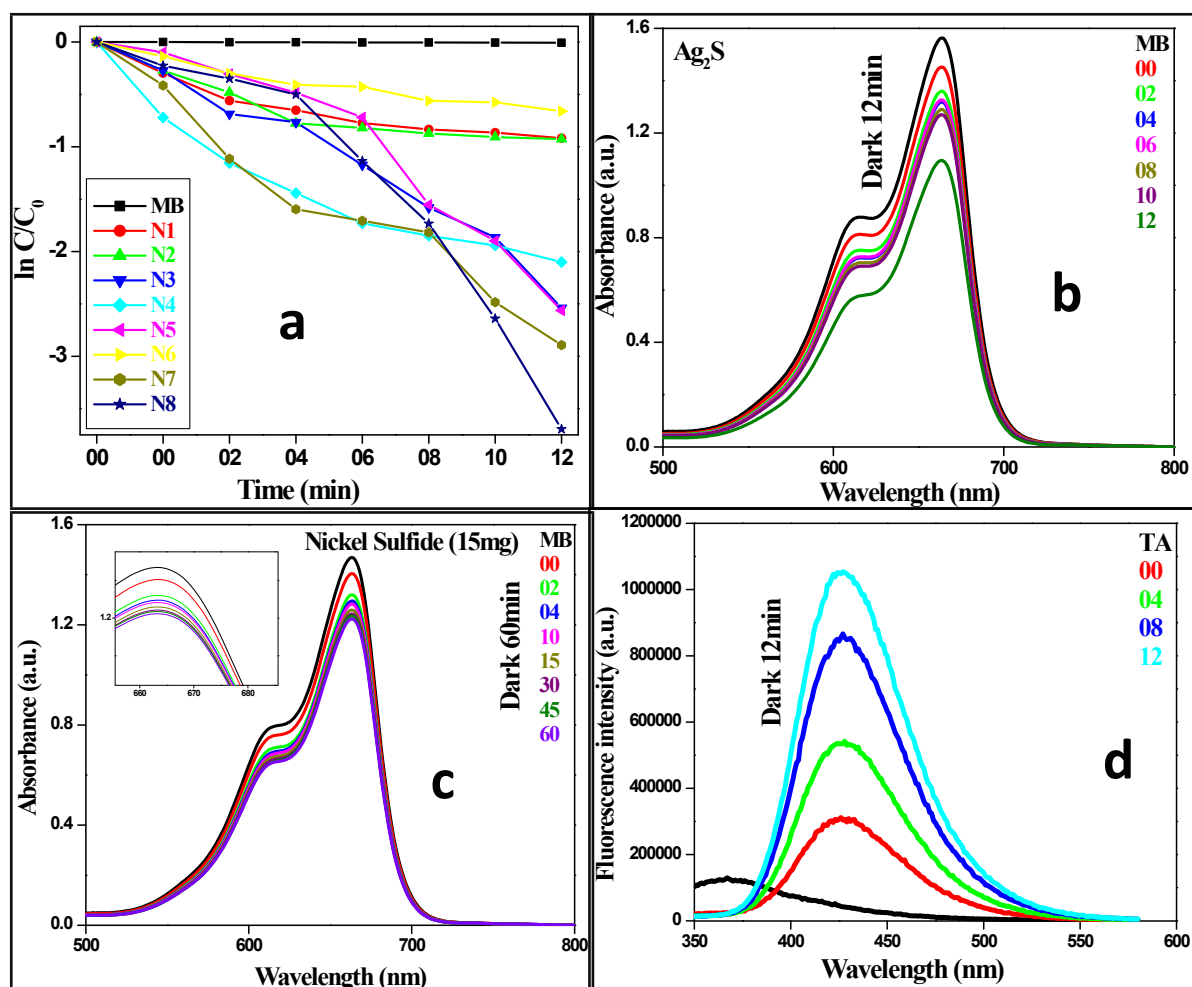

**Fig. S6** a) Degradations of MB,  $\ln(C/C_0)$  versus time in absence of light, b) Methylene Blue with  $Ag_2S$ , c) Methylene Blue with Nickel Sulphide, d) ROS generations with sample N8.

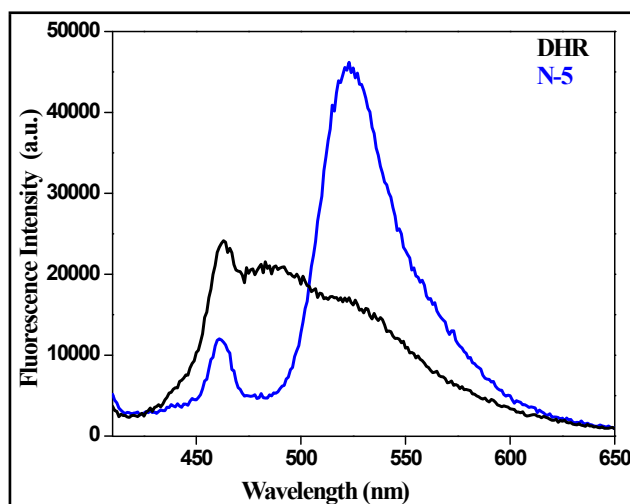

**Fig. S7** ROS generations with sample N5.

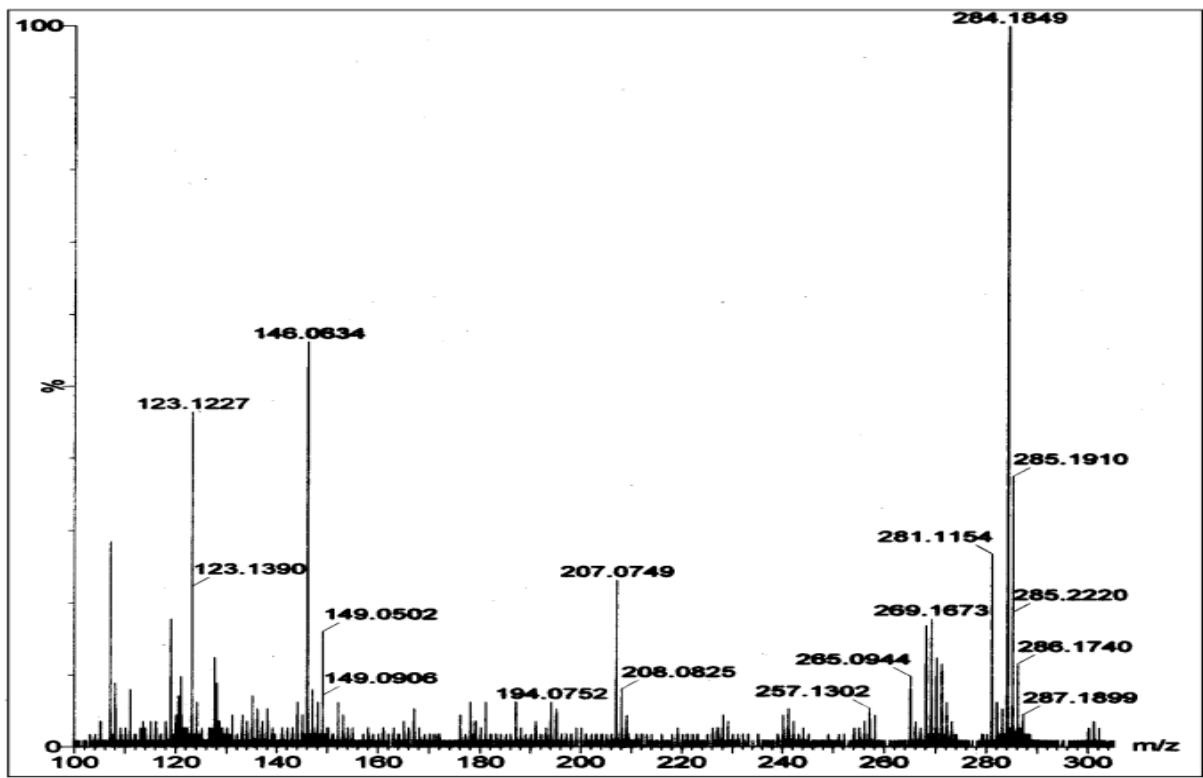

Fig. S8 ESI mass spectra of methylene blue (MB).

---

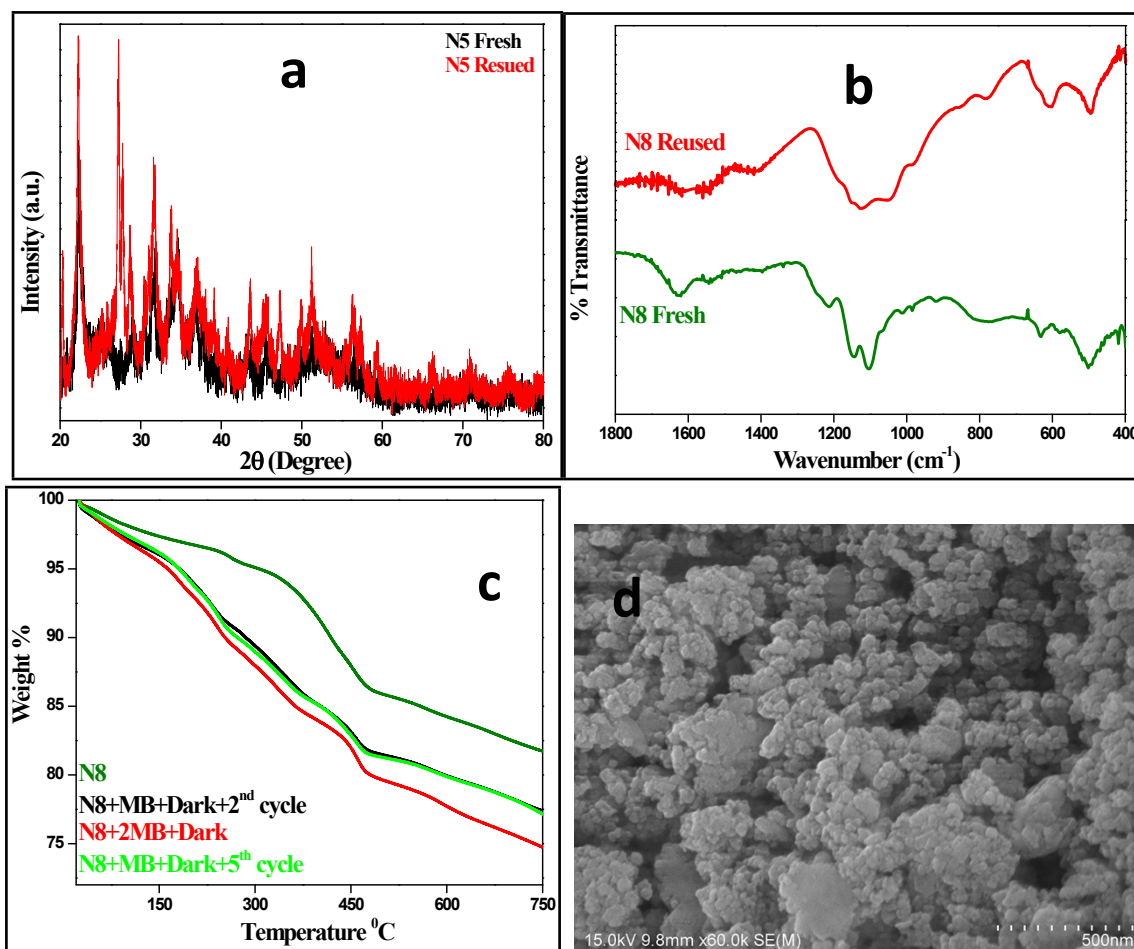

**Fig. S9** Reusability of catalyst, a) PXRD of N5 fresh and reused, b) IR of N8 fresh and reused, c) TGA data of N8 fresh and reused, d) SEM of N8 reused.
